# Supplementary material for: Design of A-D-A-Type Organic Third-Order Nonlinear Optical Materials Based on Benzodithiophene: A DFT Study
Source: MDPI journal article supplement (doi:10.3390/nano12203700), 2022-10-21
Supplement: s1 [file s1]

# Design of A-D-A-Type Organic Third-Order Nonlinear Optical Materials Based on Benzodithiophene: A DFT Study

Pingping Gong <sup>1</sup>, Lili An <sup>2,3</sup>, Junfeng Tong <sup>1,\*</sup>, Xinpeng Liu <sup>1</sup>, Zezhou Liang <sup>4,\*</sup> and Jianfeng Li <sup>1</sup>

1 Gansu Provincial Engineering Research Center for Organic Semiconductor Materials and Application Technology, School of Materials Science and Engineering, Lanzhou Jiaotong University, Lanzhou 730070, China

2 Key Laboratory of Optoelectronic Technology and Intelligent Control of Ministry Education, Lanzhou Jiaotong University, Lanzhou 730070, China

3 School of Chemical Engineering, Northwest Minzu University, Lanzhou 730030, China

4 Key Laboratory of Physical Electronics and Devices of the Ministry of Education & Shaanxi Key Lab of Photonic Technique for Information, School of Electronic Science and Engineering, Faculty of Electronic and Information Engineering, Xi'an Jiaotong University, Xi'an 710049, China

\* Correspondence: tongjunfeng139@163.com (J.T.); zezhouliang@foxmail.com (Z.L.)

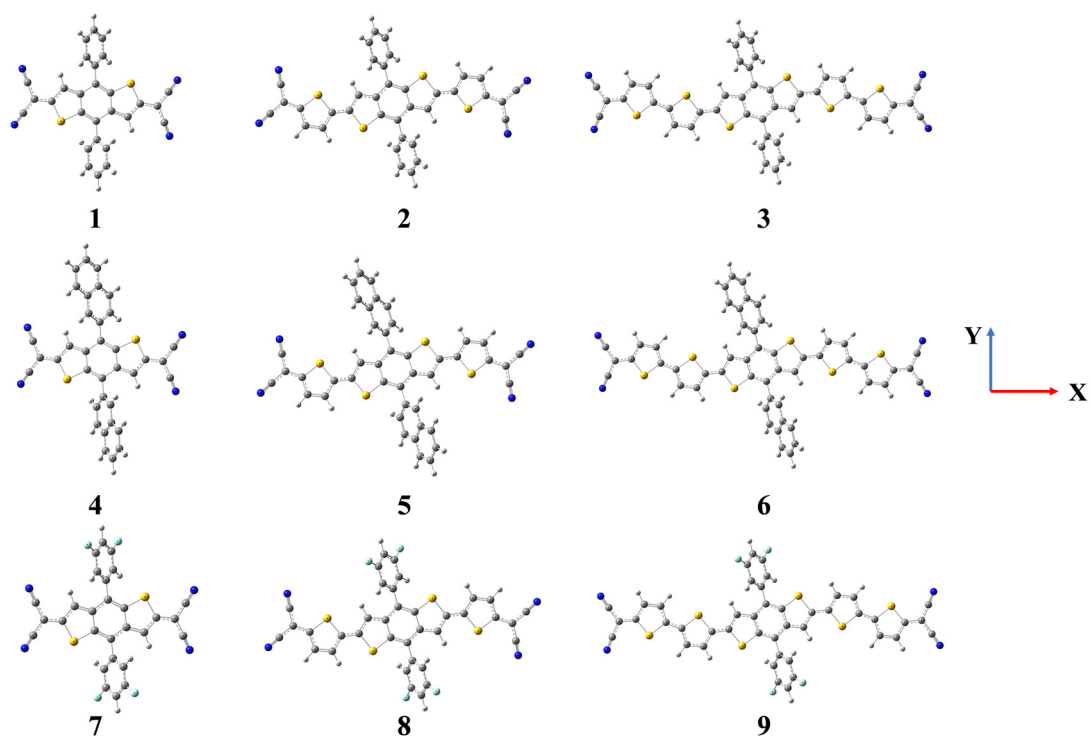

Figure S1. The front view of the optimized molecules.

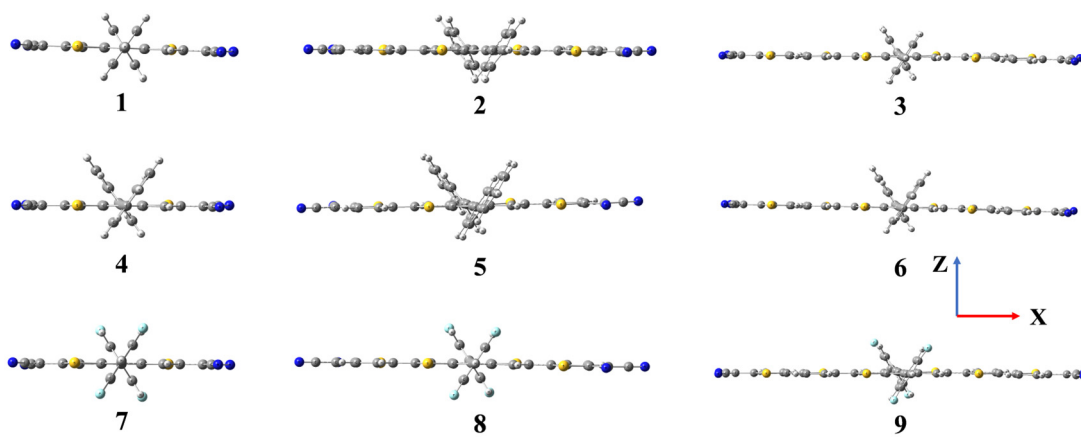

Figure S2. The side view of the optimized molecules.

**Table S1.** Static third-order NLO coefficients ( $\gamma$ ) of the nine molecules.

| molecules | $\gamma_{\text{total}}$ | $\gamma_x$ | $\gamma_y$ | $\gamma_z$ |
|-----------|-------------------------|------------|------------|------------|
| 1         | 1049.01004              | 917.64652  | 454.71147  | 227.12199  |
| 2         | 3075.94347              | 3001.97982 | 604.22474  | 290.61633  |
| 3         | 7944.82987              | 7909.6953  | 656.73289  | 354.60379  |
| 4         | 1513.12745              | 990.54997  | 1101.50398 | 308.30895  |
| 5         | 3527.2009               | 3321.45702 | 1127.27715 | 371.90817  |
| 6         | 8296.9846               | 8209.45886 | 1119.63029 | 437.22615  |
| 7         | 1319.91511              | 762.73198  | 1052.00201 | 231.749    |
| 8         | 3190.42442              | 3100.18606 | 693.86384  | 293.6109   |
| 9         | 8081.39683              | 8039.38096 | 741.86364  | 356.32401  |

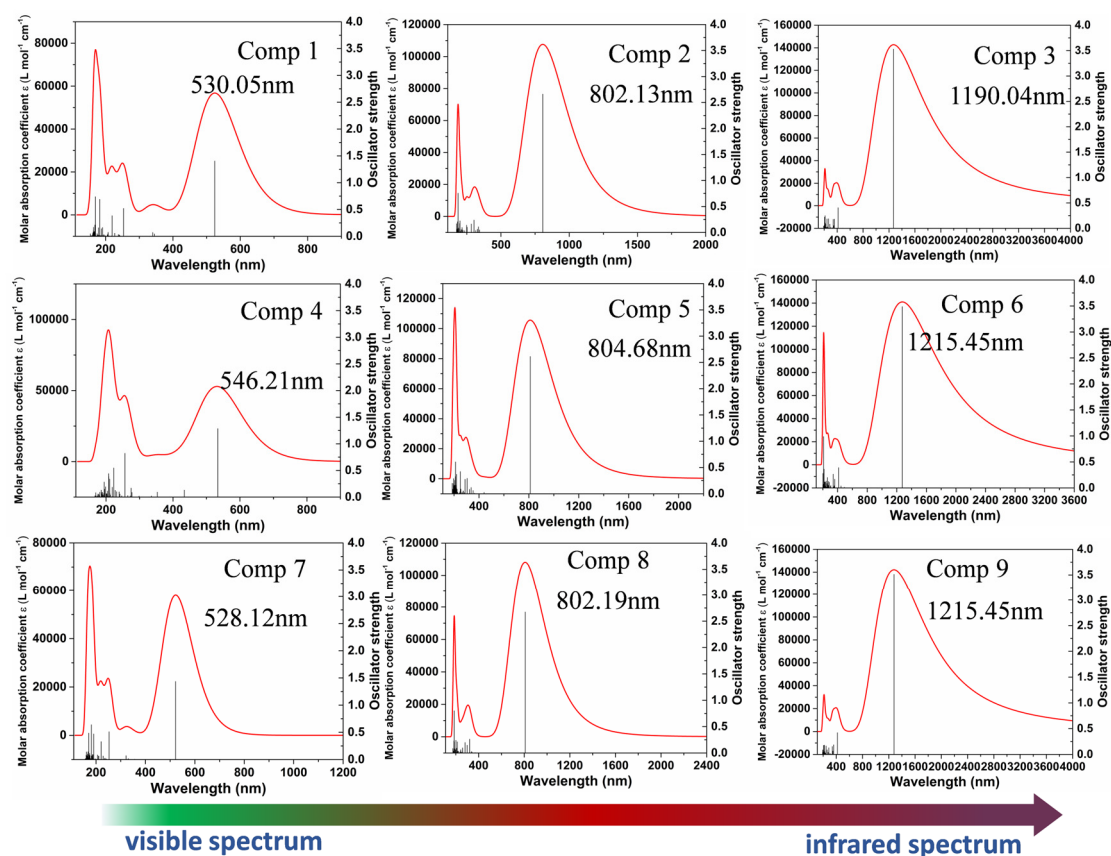

Figure S3. The UV-vis spectra of the nine compounds calculated under the wB97XD/def2-SVP level.
